## Research Article

# Protective effects of low-intensity pulsed ultrasound on aluminum overload-induced cerebral damage through epigenetic regulation of brain-derived neurotrophic factor expression

Juan Li<sup>1,\*</sup>, Dong-dong Zhang<sup>2,\*</sup>, Chao-qing Wang<sup>3</sup>, Miao Shi<sup>2</sup> and Liang-liang Wang<sup>2</sup>

<sup>1</sup>Department of Special Clinical, Liaocheng People's Hospital, No. 67 Dongchang West Road, Liaocheng City, Shandong Province 252000, China; <sup>2</sup>Department of Ultrasound, Liaocheng People's Hospital, No. 67 Dongchang West Road, Liaocheng City, Shandong Province 252000, China; <sup>3</sup>Department of Functional, Zun Hua Second Hospital, Tangshan City, Hebei 064200, China

**Correspondence:** Liang-liang Wang (wangll802011@sina.com)

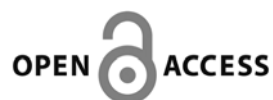

In consideration of its noninvasive administration and endogenous stimulation property, the enhancement of brain-derived neurotrophic factor (BDNF) via low-intensity pulsed ultrasound (LIPUS) could be a novel strategy for aluminum (Al) overload-induced cerebral damage. LIPUS was pre-treated 7 days before concomitantly given with aluminum chloride (AlCl<sub>3</sub>) daily for a period of 42 days. Morris water maze and elevated plus maze were performed to analyze spatial learning and memory. Western Blot and immunoprecipitation were used to detect BDNF and histone acetylation of histone H3 lysine 9 (H3K9) and histone H4 lysine 12 (H4K12) in the hippocampus. Assay of malondialdehyde (MDA), superoxide dismutase (SOD), glutathione (GSH), and glutathione peroxidase (GSH-Px) indicated the extent of oxidative damages. Aluminium exposure in rats can cause attenuated spatial learning and memory, followed by up-regulated histone deacetylase 6 (HDAC6) expression, down-regulated H3K9 and H4K12 acetylation at the PIII and PIV promoter of BDNF, all of which will eventually inhibit BDNF expression. LIPUS can recover reduced cognitive function by restoring histone acetylation and BDNF expression, accompanied with increased SOD, GSH, and GSH-Px activity. LIPUS treatment might alleviate aluminium exposure-induced cognitive decline by acetylation regulation of BDNF expression and reducing oxidative stress in the hippocampus.

## Introduction

As the richest element in the crust of earth, increased and accumulated concentration of aluminum (Al) can be observed in the human brain during normal aging [1]. Aluminium salts have been considered as an unavoidable environmental factor to enter human body by various routes, which can increase the cellular oxidative microenvironment by its potential pro-oxidant properties [2], induce various biochemical changes and neurofilament changes after prolonged aluminium exposure, and result in cognitive disorders, such as progressive neurodegeneration in the hippocampus and cerebral cortex [3–5]. Aluminium salts are considered as powerful neurotoxicant and have also been testified to cause cholinergic terminals degeneration in the cortical areas and hippocampus, which may accumulate in the cingulate bundle and thereby induce cognitive deficiency and dementia [6].

Compared with pharmacological techniques, localized and noninvasive brain stimulation techniques show a direct effect on neural circuits, which can be widely used in basic science, translational, and clinical

\* These authors contributed equally to this work.

Received: 17 July 2018  
Revised: 08 September 2018  
Accepted: 10 October 2018

Accepted Manuscript Online:  
19 October 2018  
Version of Record published:  
22 January 2019

practices. Among them, low-intensity pulsed ultrasound (LIPUS) shows the property of high spatial resolution and noninvasive processes, which make it more popular. It is worth noting that LIPUS can induce the regeneration of axon *in vivo* peripheral nerve injury trials. It is also reported that LIPUS can stimulate the intact rat brain circuitry and promote expression of brain-derived neurotrophic factor (BDNF), which can regulate the long-term memory [7–9], to protect aluminium salt-induced cortex injury in Alzheimer's disease model. Considering its noninvasive administration and endogenous BDNF stimulation character, LIPUS may point to a new way for cognitive deficiency and dementia disorders treatment.

In this context, aluminum chloride (AlCl<sub>3</sub>)-exposure-induced cognitive impairment and oxidative stress rats model are constructed to testify the neuroprotective effect of LIPUS.

## Methods and materials

### Animal

Male Sprague–Dawley (SD) rats (160–170 g) of specified pathogen-free grade were purchased from Shanghai Laboratory Animal Center (Shanghai, China). All rats were maintained in accordance with the Guidelines of Care and Use of Laboratory Animals published by the China National Institute of Health. All of the experimental procedures were approved by the Animal Care and Use Committee of Liaocheng People's Hospital. SD rats were classified into four groups (control, LIPUS, AlCl<sub>3</sub>, and LIPUS plus AlCl<sub>3</sub>). Rats in LIPUS group were exposed to LIPUS every day for 42 days. In the AlCl<sub>3</sub> group, AlCl<sub>3</sub> (100 mg/kg; oral gavage) was administered every day for 42 days. Seven days prior to AlCl<sub>3</sub> treatment, LIPUS was administered and repeated daily in LIPUS plus AlCl<sub>3</sub> group.

LIPUS plus AlCl<sub>3</sub> group rats were anesthetized (2% isoflurane in 2 l/min oxygen) in the prone position, and a heating pad was used to maintain the body temperature. After mounting the rat heads to a stereotaxic apparatus (Stoelting, Wood Dale, IL, U.S.A.), LIPUS stimulation was applied around the top of the cranium.

### LIPUS apparatus

A piezoelectric transducer (A392S; Panametrics, Waltham, MA, U.S.A.) was set as 1 Hz, 5% duty cycle, and 50 ms burst lengths, which was then fixed with a stereotaxic apparatus and focused the acoustic beam to the 3.0 mm posterior and 2.5 mm lateral region of the bregma. The spatial-peak temporal-average intensity (ISPTA) was measured with a radiation force balance (RFB, Precision Acoustics, Dorset, U.K.) and was set as 528 mW/cm<sup>2</sup>. In order to maximize the transmission of the LIPUS (three sonications, 5 min duration, and 5 min interval), ultrasound transmission gel (Pharmaceutical Innovations, Newark, NJ, U.S.A.) was mounted to the detected region.

### Behavioral assessment

A total of 40 SD rats were classified into four groups (control, LIPUS, AlCl<sub>3</sub>, and LIPUS plus AlCl<sub>3</sub>), and all these rats were used to evaluate the effects of LIPUS on behavioral outcomes in AlCl<sub>3</sub>-treated rats. A custom-made escape plastic stand (20 cm in diameter on the circular top) was put approximately 2 cm above the surface of the water. The rats were carefully released in the water to face the direction of swimming pool wall, then the rats were led to the escape plastic stand and stayed there for 20 s, while the maximum acquisition time was set as 90s. The time needed by the rats to arrive at the escape plastic stand on the 20th day after AlCl<sub>3</sub> exposure was recorded and defined as acquisition latency (AL). After that, the same escape plastic stand was released about 2 cm below the water level. The times needed to reach the escape plastic stand on the 21st day and 42nd day after AlCl<sub>3</sub> exposure was recorded and defined as retention latency (RL), which was measured 1 day after AL was recorded, and the relevant rats were released randomly at one end of the edges facing the swimming pool wall.

The elevated plus maze, which had two open arms (50 × 12 cm) and was intersected with two closure walls, was raised 66 cm above the floor level. Rats were released at one side of the open arm facing outside of the center part of the elevated plus maze. On the 20th day after the exposure of AlCl<sub>3</sub>, the time needed by the rats to move from one open arm to the closed arm was defined as transfer latency (TL). Similarly, such behavioral performances were measured on the 21st and 42nd day.

### Western blot

SD rats were classified into four groups (control, LIPUS, AlCl<sub>3</sub>, and LIPUS plus AlCl<sub>3</sub>), 4 h after the last LIPUS stimulation, six rats were killed and fresh hippocampus tissues were homogenized by T-Per extraction reagent (Pierce Biotechnology, Inc.). Lysates were centrifuged and supernatants were harvested and assayed with Protein Assay Reagent (Bio-Rad, CA, U.S.A.). A 40 µg protein was placed on 4–20% SDS-PAGE, transferred to Immun-Blot<sup>®</sup> PVDF membranes (Bio-Rad, CA, U.S.A.), blocked for 1 h with tris-buffered saline tween-20 (TBST)-containing 5%

**Table 1** Primer sequences used for RT-PCR

| Gene           | Forward Primer (5'-3')  | Reverse Primer (5'-3')  |
|----------------|-------------------------|-------------------------|
| <i>Hdac1</i>   | AGTCTGTACTACTACGACGGG   | TGAGCAGCAAATTGTGAGTCAT  |
| <i>HDAC2</i>   | AGAAGACCCGGACAAAAGAATTT | ACATTCTACGACCTCCTTCAC   |
| <i>Hdac3</i>   | GGTTCAGGAAGCCTTCTACCT   | ACTCTCTGCTCCAACTTCATACA |
| <i>HDAC4</i>   | CCAAGGTTTACCACAGGTCT    | TTGTGCCGTAGAGGAGTGTG    |
| <i>HDAC5</i>   | AGCCCACCACGCTTCTTTG     | GTCATCACGGCTGTCATAGGG   |
| <i>HDAC6</i>   | CAGCACACTTCTTTCCACCAC   | AAGTAGGCAGAAACCCCGAGT   |
| <i>HDAC7</i>   | CCTACAGAACTCTTGAGCCCT   | GGGGCACTCTCCTTCTCTGA    |
| <i>HDAC8</i>   | ACTATTGCCGGAGATCCAATGT  | CCTCCTAAAATCAGAGTTGCCAG |
| <i>HDAC9</i>   | GCGGTCCAGGTTAAAACAGAA   | GCCACCTCAAACACTCGCTT    |
| <i>HDAC10</i>  | CAGAGGAAGAGTTGGGCTTG    | CATTGTGCACAGCTCCTGTT    |
| <i>HDAC11</i>  | CAATGGGCATGAGCGAGAC     | TGTGGCGTTGTAGACATCC     |
| <i>Bdnf P1</i> | GTGCCTCTCGCTAGTCATC     | CACCATGACTAAGGGTCTCCA   |
| <i>BdnfP2</i>  | TGAGGATAGGGGTGGAGTTG    | GCAGCAGGAGGAAAAGGTTA    |
| <i>BdnfP3</i>  | GTGTGGTGTGTGTGCGTGTA    | GCTAACCTCCTCCCTCTCC     |
| <i>BdnfP4</i>  | GCCTGCCCTAGCCTTTACTT    | GGCCGGTTTTCTTTCTTTT     |
| <i>BdnfP5</i>  | CCCTCCCCCTTTAACTGAA     | GGGGGTGAGGAAAGAGAAAAG   |
| <i>BdnfP6</i>  | CTCCTACTCTGGGGCACATT    | ACCGGCTTCTGTCCATTTT     |
| <i>BdnfP7</i>  | CACGACCCGAGAGACAG       | TCTCTCACCCACCTTCTCT     |
| <i>BdnfP8</i>  | TGAGTTTTTCATGTGCCCTCT   | CAGTCTATGGCTGGTCAGGA    |
| <i>BdnfP9</i>  | GAATGCCCTTCTTGAGGACT    | AGCACATCTAGGTTTACTGCAT  |
| <i>Gapdh</i>   | CTACCCACGGCAAGTTCAAC    | CCAGTAGACTCCACGACATA C  |

(w/v) skimmed milk, and then incubated overnight at 4°C in a solution with the primary antibody. A horseradish peroxidase-conjugated secondary antibody was incubated for 1 h at room temperature. Western Lightning ECL reagent Pro (Bio-Rad, CA, U.S.A.) was used to develop the signals, which was captured by ImageQuant™ LAS 4000 biomolecular imager (GE Healthcare Life Sciences, Pennsylvania, U.S.A.) and quantitated by Image J software (National Institute of Health, Bethesda, MD, U.S.A.).

### Enzyme-linked immunosorbent assay (ELISA)

On the 42nd day after AlCl<sub>3</sub> exposure, six rats were killed and fresh hippocampus tissues were homogenized by T-Per extraction reagent (Pierce Biotechnology, Inc.) to get lysates. After centrifuge, the supernatants were obtained. BDNF ELISA kit (eBioscience, San Diego, CA, U.S.A.) was applied according to the manufacturer's protocol. A microplate reader (SpectraMax M5, Molecular Devices) at a wavelength of 450 nm was used to detect all standards and samples.

### The ChIP assay

The simple ChIP Enzymatic Chromatin IP Kit (Cell Signaling Technology) was used following the manufacturer's instruction. In brief, primary antibodies (histone deacetylase 4 [HDAC4], HDAC6, or IgG antibody as a control) were coated to get immunoprecipitated DNA, which was subjected to real-time PCR (RT-PCR) using specific BDNF promoters primers (PI, PII, PIII, PIV, and PIX) (Supplementary Table S1). Then the cumulative fluorescence for each amplification was normalized to the input DNA.

### Real-time polymerase chain reaction (RT-PCR)

The RT-PCR reaction was performed using an ABI STEP ONE RT-PCR System (Applied Biosystems) in a 15-μl volume mixture using 2× FastStart Universal SYBR Green Master Mix (Bio-Rad, Hercules, CA, U.S.A.), which contained 0.375 μM primer and 0.5 μl cDNA. The protocol was followed as: 95°C denaturation for 3 min, 40 cycles of 95°C for 30 s, 60°C for 30 s, finally 72°C for 1 min. Relative gene expression was quantified using the comparative ΔC<sub>T</sub> method. The relative expression was normalized to GAPDH mRNA expression. Primer sequences were listed in Table 1.

### Malondialdehyde (MDA) assay

The thiobarbituric acid (TBA) reaction in the hippocampus was used to determine the level of malondialdehyde (MDA). Briefly, the tissue homogenate was incubated with 10% TCA and 0.67% TBA, and heated at 100°C for 30

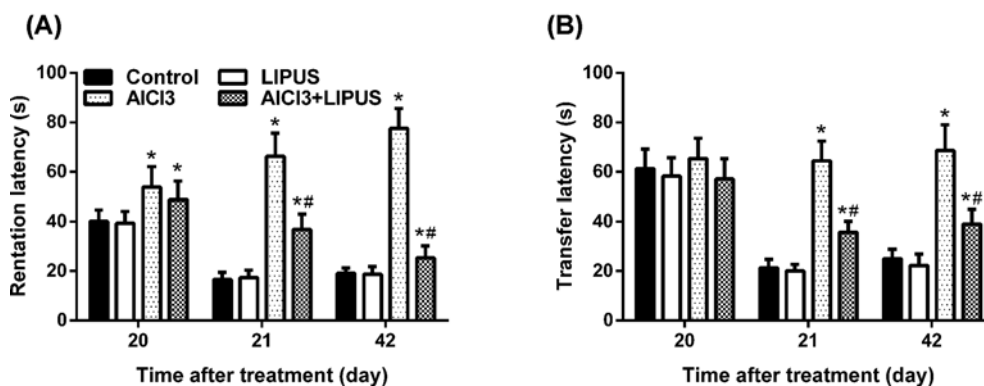

**Figure 1. Behavioral effects of LIPUS on AlCl<sub>3</sub> exposure rats**

(A) Memory retention effect of LIPUS. The AL on the 20th day and RL on the 21st and 42nd day in the AlCl<sub>3</sub>-administrated rats or LIPUS-stimulated group was evaluated. (B) Memory performance evaluation of LIPUS. The TL on the 20th, 21st, and 42nd day in AlCl<sub>3</sub>-administrated rats or LIPUS-stimulated group was evaluated. (Results were shown as mean  $\pm$  s.d.,  $n=10$  per group; \* $P<0.05$  vs control group, # $P<0.05$  vs AlCl<sub>3</sub> group).

min. Then the supernatant was added into a 96-well plate and measured using 532 nm microplate reader (BioTek Instruments, Winooski, VT, U.S.A.). The values were defined as nmol/mg of proteins involved in tissue.

### Superoxide dismutase (SOD) assay

A SOD assay kit (Cayman Company, MI, U.S.A.) was utilized according to the instruction. Briefly, the rat hippocampus was gently homogenized after the 24 h reperfusion. Hypoxanthine and xanthine oxidase were used as the superoxide generator, and nitro blue tetrazolium (NBT) was used as the superoxide indicator, which was measured using a 96-well plate reader (BioTek Instruments, Winooski, VT, U.S.A.) at 450 nm and the SOD activity was defined as U/mg protein.

### Glutathione (GSH) activity

A Glutathione (GSH) assay kit (Cayman Chemical Company, Ann Arbor, MI) was applied to evaluate GSH activity. The homogenized hippocampus tissue was centrifuged ( $10000 \times g$  15 min, 4°C), and 0.6 mmol/l 5,5'-dithiobis(2-nitrobenzoic acid) (DTNB), 0.2 mg/ml NADPH, and glutathione reductase were mixed together to initiate the reaction.

### Glutathione peroxidase (GSH-Px) activity

A glutathione peroxidase (GSH-Px) assay kit (Cayman Chemical Company, Ann Arbor, MI) was applied to evaluate the GSH-Px activity. Briefly, the homogenized hippocampus tissues were centrifuged ( $10000 \times g$ , 15 min, 4°C). Then 20  $\mu$ l samples, 100  $\mu$ l PBS (pH 7.4), 50  $\mu$ l co-substrate mixture, and 20  $\mu$ l cumene hydroperoxide were mixed into the 96-well. Finally, a microplate reader (DTX800, Beckman Coulter, Austria) at 340 nm was applied to get the absorbance every minute.

### Statistical analysis

All the data were shown as mean  $\pm$  SEM. Statistical analysis was performed using one-way ANOVA. Two-way analysis of variance (ANOVA) followed by Tukey's test for multiple comparisons was applied to analyze the behavioral assessment data.  $P$ -value  $\leq 0.05$  was set as statistical significance.

## Results

### LIPUS recovers aluminium-induced memory acquisition and retrieval attenuation

Consistent with previous reports [10], Morris water maze task results indicated that rats treated with AlCl<sub>3</sub> had learning and memory deficits when compared with normal control group rats (Figure 1A,B). On day 20, AL of the AlCl<sub>3</sub>-treated group was increased when compared with the control group ( $P<0.05$ ), while AlCl<sub>3</sub> plus LIPUS could

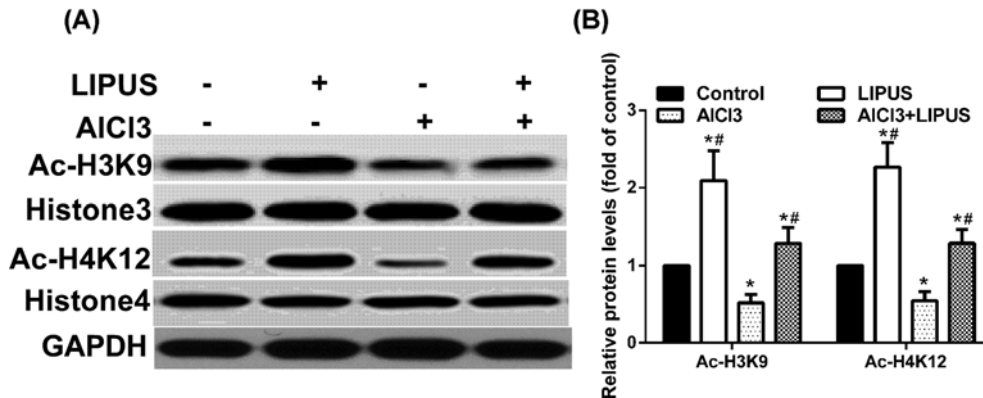

**Figure 2. Effects of LIPUS and AlCl<sub>3</sub> treatment on rat hippocampus histone acetylation**

The histone acetylation levels of Ac-H3K9 (A) and Ac-H4K12 (B) were detected by Western blot analysis in the hippocampus. Results were shown as mean  $\pm$  s.d. ( $n=6$ ). \* $P < 0.05$  vs control group, # $P < 0.05$  vs AlCl<sub>3</sub> group.

decrease the latency ( $P < 0.05$ ). After training, RL was decreased significantly in the normal control group on the 21st and 42nd day when compared with the AlCl<sub>3</sub> administration group on the 20th day. AlCl<sub>3</sub> plus LIPUS resulted in a significant decrease in RL on 21st and 42nd day when compared with AlCl<sub>3</sub> administration group ( $P < 0.05$ ). Moreover, LIPUS plus AlCl<sub>3</sub> could decrease RL on the 42nd day when compared with the AlCl<sub>3</sub> administration group on the 20th day. All of these results indicated that LIPUS stimulation could improve the latency induced by AlCl<sub>3</sub> exposure.

TL referred to the evaluated memory in the elevated plus maze. On the 20th day, there was no significant different mean TL between different groups (Figure 1B). After acclimatization training, there was a significant decrease in mean TL in the normal control and LIPUS groups on the 21st and 42nd day when compared with TL on the 20th day. Compared with pre-trained TL on the 20th day, the mean TL in AlCl<sub>3</sub>-treated group showed no significant differences on the 21st and 42nd day. While, when compared with the normal control group on the 21st and 42nd day a significant increase in TL was observed. Moreover, compared with the TL in AlCl<sub>3</sub> group, AlCl<sub>3</sub> plus LIPUS group resulted in a significant decline in TL on the 21st and 42nd day. All of these data suggested that chronic AlCl<sub>3</sub> exposure markedly deteriorated spatial memory retention and LIPUS stimulation could relieve AlCl<sub>3</sub>-induced deficits in memory acquisition and retrieval.

## LIPUS alleviates the acetylation level of histone H3 lysine 9 and histone H4 lysine 12 (H4K12) reduced by AlCl<sub>3</sub> exposure

Histone H3 lysine 9 (H3K9) and histone H4 lysine 12 (H4K12) have been correlated with transcriptional activation and chromatin reassembly during DNA replication. As the main brain structure for cognitive function, the hippocampus was utilized to perform further biochemical detection. To investigate whether LIPUS and AlCl<sub>3</sub> could regulate the acetylation of histones in the hippocampus, the amount of acetyl-H3K9 (Ac-H3K9) and acetyl-H4K12 (Ac-H4K12) were detected (Figure 2A,B). After 42 days of exposure, AlCl<sub>3</sub> exposure could decrease the acetylation level of H3K9 and H4K12, while LIPUS could alleviate the acetylation level of H3K9 and H4K12 reduced by AlCl<sub>3</sub> exposure.

## LIPUS reduces the increased expression of HDAC6 exposed to AlCl<sub>3</sub>

Histone deacetylases (HDAC) can be classified into five subfamilies as Class I (HDAC1, 2, 3, and 8), Class IIa (HDAC4, 5, 7, and 9), Class IIb (HDAC6 and 10), Class III (SIRT1-7), and Class IV (HDAC11). RT-PCR was utilized to determine whether the effects of LIPUS and AlCl<sub>3</sub> treatment on H3K9 and H4K12 acetylation were related to HDAC. Only HDAC6 showed differential expression in mRNA level (Figure 3A,B). AlCl<sub>3</sub> exposure could increase the expression of HDAC6, while LIPUS reduced the marked increase in HDAC6 exposed to AlCl<sub>3</sub>, which suggested the involvement of acetylation in learning and memory modulation.

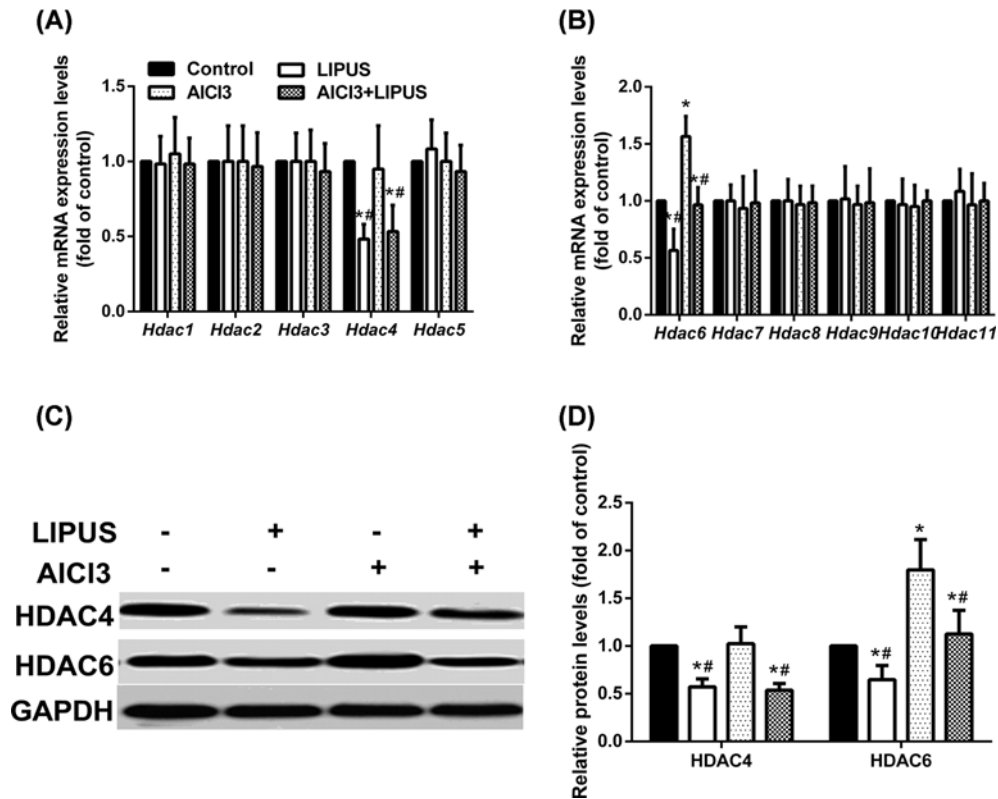

**Figure 3.** Effects of LIPUS and AICl<sub>3</sub> treatment on the expression of HDAC in the rat hippocampus

HDAC mRNA levels were measured by qPCR (A,B), HDAC4 and HDAC6 protein levels were measured by Western blot analyses (C,D). Results were shown as mean  $\pm$  s.d. (n = 6). \**P* < 0.05 vs control group, #*P* < 0.05 vs AICl<sub>3</sub> group.

## LIPUS up-regulates H3K9 and H4K19 acetylation to increase BDNF expression

Previous studies have shown neuroprotection effects associated with BDNF in memory-related disorders. To clarify the link associated with HDACs and BDNF, the mRNA (Figure 4A) and protein (Figure 4B–D) expression of BDNF were measured, and the results showed that LIPUS increased BDNF expression and AICl<sub>3</sub> decreased BDNF expression, while LIPUS could regain the reduced expression of BDNF exposed to AICl<sub>3</sub> (Figure 4A–D).

Next, the role of HDAC6 and HDAC4 *BDNF* promoter association were investigated. Chromosome immunoprecipitation analysis showed that there was no association between HDAC6 and *BDNF* PI, PII or PIX (data not shown). LIPUS reduced HDAC6-*BDNF* PIII and PIV association and AICl<sub>3</sub> increased it compared with the control group, while LIPUS could block AICl<sub>3</sub>-induced increase in HDAC6-*BDNF* PIII and PIV association (Figure 5A,B). Coimmunoprecipitated HDAC4 with *BDNF* PIII and PIV showed no significant difference among different groups (data not shown). Histone acetylation has been shown to regulate BDNF expression in various scenarios, we, therefore, measured histone acetylation in the promoter region of BDNF in these rats. LIPUS could cause the increased histone acetylation of H3K9 and H4K19 at *BDNF* PIII and PIV, and AICl<sub>3</sub> could lead to reduced histone acetylation of H3K9 and H4K19 at *BDNF* PIII and PIV, while LIPUS could alleviate the reduced histone acetylation of H3K9 and H4K19 at *BDNF* PIII and PIV exposed to AICl<sub>3</sub> (Figure 5C,D).

## Effects of LIPUS and AICl3 treatment on the antioxidant defenses

The lipid peroxidation after AICl<sub>3</sub> exposure was demonstrated by MDA level and the neuroprotective effect of antioxidant enzyme activities. The data suggested a significant MDA elevation in AICl<sub>3</sub> exposure group compared with LIPUS and control group in the hippocampus (Figure 6A). AICl<sub>3</sub> exposure significantly decreased the activities of SOD, GSH, and GSH-Px (Figure 6B–D, respectively), while LIPUS can recover the antioxidant enzyme activities decreased by AICl<sub>3</sub>.

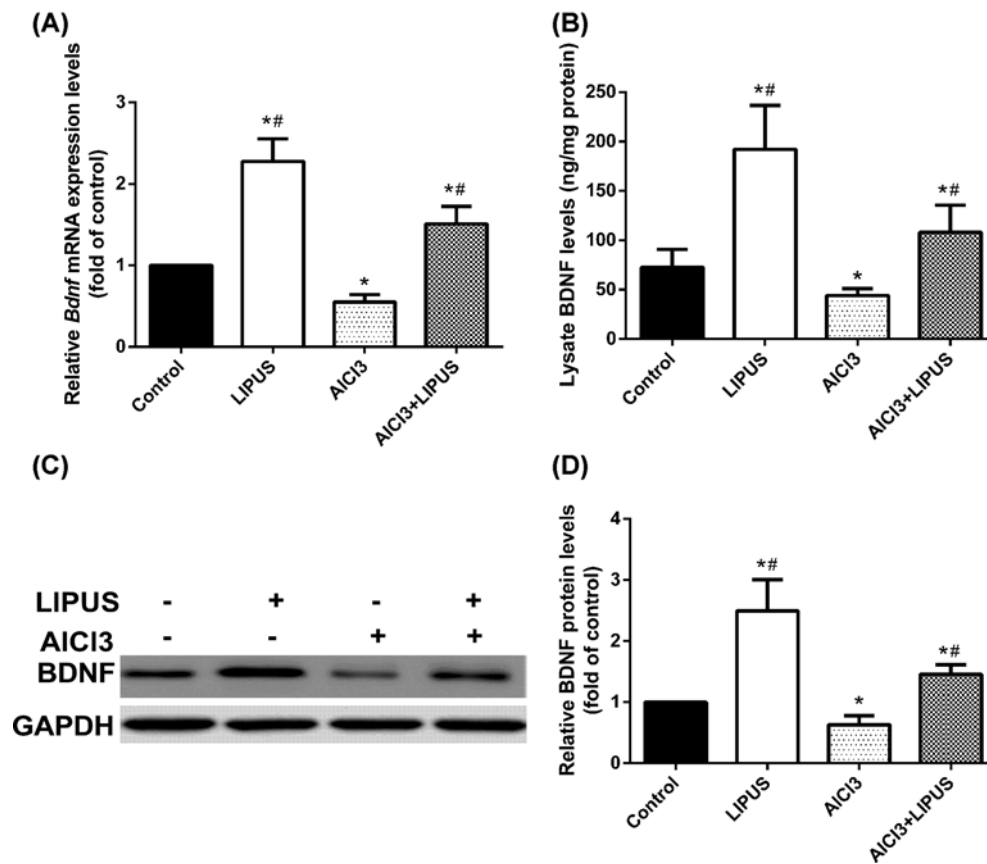

**Figure 4. Treatment effects of LIPUS and AlCl<sub>3</sub> on BDNF mRNA and protein expression in rat hippocampus**  
*Bdnf* mRNA levels were measured by qPCR (A). BDNF level in the rat hippocampus lysate was detected by ELISA (B). The BDNF protein was detected by Western blot (C,D). Results were shown as mean  $\pm$  s.d. ( $n=6$ ). <sup>\*</sup> $P < 0.05$  vs control group, <sup>#</sup> $P < 0.05$  vs AlCl<sub>3</sub> group.

## Discussion

Neurodegenerative diseases-associated chronic cerebral damages seriously affect the quality and length of human life. Nevertheless, the etiology and pathogenesis mechanism involved in cerebral damage is not clearly illustrated. So, it is vital to further define the mechanisms involved in cerebral damage and put forward effective treatment strategy. The current study shows that AlCl<sub>3</sub> exposure leads to impaired spatial learning and memory, which is accompanied by decreased H3K9 and H4K19 acetylation, reduced BDNF expression and increased oxidative stress. While LIPUS treatment is sufficient to alleviate reduced histone acetylation and cognitive dysfunction in AlCl<sub>3</sub> exposed rat.

Aluminium salts are considered as potent neurotoxins, which may pose many adverse effects on the central nervous system *in vitro* and induce neurofibrillary degeneration in animal models [11]. While, in biological tissue or *in vivo*, aluminium salts just have the potential to promote reactive oxygen species (ROS) formation and do not show any direct pro-oxidant properties [12]. It is worth noting that the connection between Alzheimer's disease and aluminium salts is still in controversy. Experimentally, chronic exposure to aluminium can cause neuropathological changes and cognitive impairments, which are similar to those of Alzheimer's disease, including the deficiency of the neurotransmitter acetylcholine, extracellular amyloid  $\beta$  (A $\beta$ ) deposits, neurofibrillary tangles, and the loss of neurons [13,14]. So, the relevant research in aluminium exposure can give vital application for the prevention and therapy of Alzheimer's disease.

It is reported that HDACs-relevant histone deacetylation is involved in the regulation of memory acquisition and maintenance on both physiological and pathological conditions [15]. Dysregulated histone acetylation is observed in old mice with age-induced memory impairment and restoration of histone acetylation can recover cognitive function and memory-associated gene expression [16,17]. In aged rats, it is reported that sodium butyrate (histone deacetylase inhibitor) not only reverses the signaling changes including down-regulation of HDAC2 and restoration of BDNF

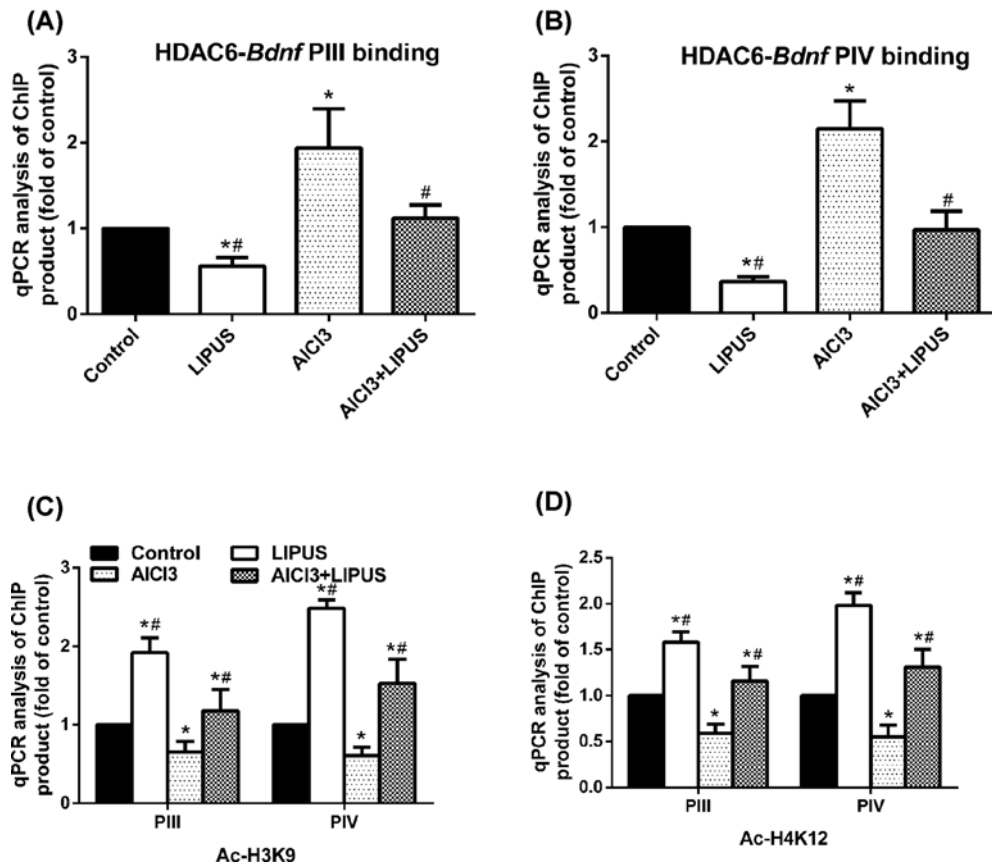

**Figure 5.** Effects of LIPUS and  $\text{AlCl}_3$  treatment on the HDAC6-PiII and HDAC6-PiV association and the acetylation levels of H3K9 and H4K12 at *bdnf* promoters in rat hippocampus

HDAC6-PiII (A) and HDAC6-PiV (B) association were detected by ChIP and qPCR analyses. The H3K9 (C) and H4K12 (D) acetylation levels at *bdnf* promoters were detected by ChIP and qPCR. Results were shown as mean  $\pm$  s.d. ( $n=6$ ). \* $P < 0.05$  vs control group, # $P < 0.05$  vs  $\text{AlCl}_3$  group.

expression but also rescues cognitive impairment caused by repeated isoflurane exposure [18]. Similarly, repeated isoflurane exposure to neonatal mice also results in cognitive deficit and abnormal histone acetylation in the hippocampus, a brain region which is important for learning and memory in adulthood [19]. Therapies confronting histone acetylation regulation in the hippocampus may be future new directions.

As an important neurotrophic factor involved in various neuronal functions, BDNF levels positively correlate with cognitive function. For instance, the insufficient level of BDNF has a vital role in the development and pathology of Alzheimer's disease, Parkinson's disease, and Huntington's disease [20], while recombinant BDNF improves cognition and increases hippocampal synapse density in mice model of Alzheimer's disease [21,22]. In general, LIPUS may offer a new solution to the endogenous enhancement of BDNF through neural circuits stimulation to circumvent the blood-brain barrier.

It is testified that LIPUS can promote bone and tissue regeneration and have a positive improvement on axonal regeneration showed by *in vivo* peripheral nerve injury trials [23]. The locally applied ultrasound stimuli could markedly increase the number of Schwann cell nuclei and the expression of BDNF on the damaged sciatic nerve [24]. LIPUS reverses the results of aluminium on BDNF expression and oxidative stress. We believe such regulation is through histone acetylation since we found that acetylation of H3K9 and H4K12 at the PiII and PiV promoter of BDNF is suppressed by aluminium exposure and alleviated by LIPUS treatment. Given that decreased histone acetylation and BDNF levels are associated with aging-related cognitive decline and that patients with Alzheimer's disease have reduced BDNF expression [25], LIPUS may also be beneficial to cognitive function in aging and Alzheimer's disease.



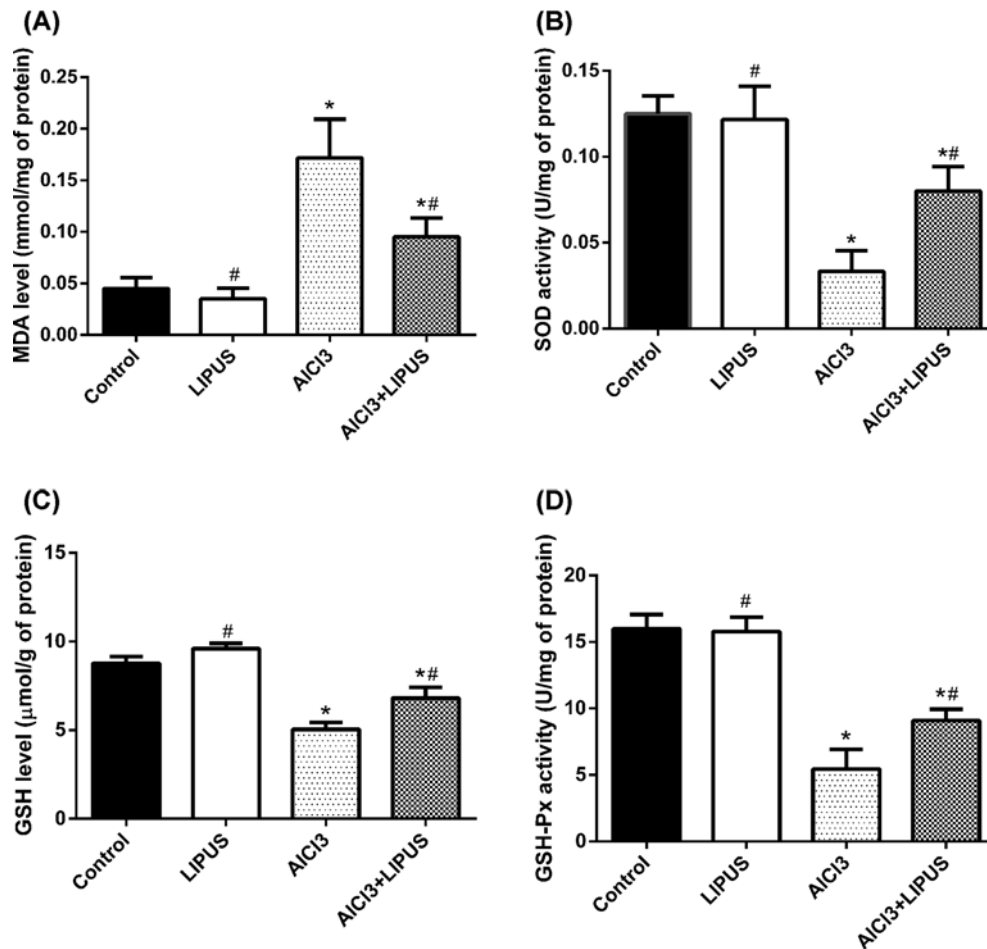

**Figure 6.** Effects of LIPUS and AICl<sub>3</sub> treatment on the antioxidant defenses in rat hippocampus

(A) The effects of LIPUS and AICl<sub>3</sub> on the MDA level in rat hippocampus. (B) The effect of LIPUS and AICl<sub>3</sub> on SOD activity in rat hippocampus. (C) The effect of LIPUS and AICl<sub>3</sub> on GSH in rat hippocampus. (D) The effect of LIPUS and AICl<sub>3</sub> on GSH-Px in rat hippocampus. Results were shown as mean  $\pm$  s.d. (n = 6). \**P* < 0.05 vs control group, #*P* < 0.05 vs AICl<sub>3</sub> group.

It is worth mentioning that LIPUS alone cannot enhance the anti-oxidative enzymes activity, while it can recover the antioxidant enzyme activities decreased by AICl<sub>3</sub> and decrease the oxidative stress in the AICl<sub>3</sub>-treated hippocampus. AICl<sub>3</sub> may cause excitatory damage to neurons and LIPUS alone or combined with AICl<sub>3</sub> could up-regulate the expression of BDNF when compared with control group, such mechanisms may contribute to the decrease in oxidative stress.

In our study, we demonstrate that LIPUS is sufficient to alleviate histone acetylation and cognitive dysfunction in aluminum exposed rats through acetylation regulation of BDNF. Whether LIPUS can be utilized to perform some pre-clinical trials, may need to be testified in more models.

### Author Contribution

J.L., D.-d.Z., C.-q.W., and M.S. performed the experiments, and analyzed and interpreted the data. L.-l.W. wrote the manuscript. All authors read and approved the final submission.

### Competing Interests

The authors declare that there are no competing interests associated with the manuscript.

### Funding

This work was funded by an internal source within the Liaocheng People's Hospital.

## Abbreviations

AL, acquisition latency; AlCl<sub>3</sub>, aluminum chloride; BDNF, brain-derived neurotrophic factor; GSH, glutathione; GSH-Px, glutathione peroxidase; H3K9, histone H3 lysine 9; H4K12, histone H4 lysine 12; HDAC, histone deacetylase; LIPUS, low intensity pulsed ultrasound; MDA, malondialdehyde; RL, retention latency; SDD, Sprague–Dawley; SOD, superoxide dismutase; TL, transfer latency; TBA, thiobarbituric acid.

## References

- Mcdermott, J.R., Smith, A.I., Iqbal, K. and Wisniewski, H.M. (1979) Brain aluminum in aging and Alzheimer disease. *Neurology* **29**, 809, <https://doi.org/10.1212/WNL.29.6.809>
- Prakash, A. and Kumar, A. (2013) Mitoprotective effect of *Centella asiatica* against aluminum-induced neurotoxicity in rats: possible relevance to its anti-oxidant and anti-apoptosis mechanism. *Neurol. Sci.* **34**, 1403–1409, <https://doi.org/10.1007/s10072-012-1252-1>
- Yuan, C.Y., Lee, Y.J. and Hsu, G.S.W. (2012) Aluminum overload increases oxidative stress in four functional brain areas of neonatal rats. *J. Biomed. Sci.* **19**, 1–9, <https://doi.org/10.1186/1423-0127-19-51>
- Kumar, A., Dogra, S. and Prakash, A. (2009) Protective effect of curcumin (*Curcuma longa*), against aluminium toxicity: possible behavioral and biochemical alterations in rats. *Behav. Brain Res.* **205**, 384–390, <https://doi.org/10.1016/j.bbr.2009.07.012>
- Sumathi, T., Shobana, C., Thangarajeswari, M. and Usha, R. (2015) Protective effect of L-Theanine against aluminium induced neurotoxicity in cerebral cortex, hippocampus and cerebellum of rat brain - histopathological, and biochemical approach. *Drug Chem. Toxicol.* **38**, 22–31, <https://doi.org/10.3109/01480545.2014.900068>
- Platt, B., Fiddler, G., Riedel, G. and Henderson, Z. (2001) Aluminium toxicity in the rat brain: histochemical and immunocytochemical evidence. *Brain Res. Bull.* **55**, 257–267, [https://doi.org/10.1016/S0361-9230\(01\)00511-1](https://doi.org/10.1016/S0361-9230(01)00511-1)
- Bekinschtein, P., Cammarota, M., Katze, C., Slipczuk, L., Rossato, J.I., Goldin, A. et al. (2008) BDNF is essential to promote persistence of long-term memory storage. *Proc Natl. Acad. Sci. U.S.A.* **105**, 2711–2716, <https://doi.org/10.1073/pnas.0711863105>
- Rezayat, E. and Toostani, I.G. (2016) A review on brain stimulation using low intensity focused ultrasound. *Basic Clin. Neurosci.* **7**, 187–194
- Tufail, Y., Matyushov, A., Baldwin, N., Tauchmann, M.L., Georges, J., Yoshihiro, A. et al. (2010) Transcranial pulsed ultrasound stimulates intact brain circuits. *Neuron* **66**, 681, <https://doi.org/10.1016/j.neuron.2010.05.008>
- Lin, W.T., Chen, R.C., Lu, W.W., Liu, S.H. and Yang, F.Y. (2015) Protective effects of low-intensity pulsed ultrasound on aluminum-induced cerebral damage in Alzheimer's disease rat model. *Sci. Rep.* **5**, 9671, <https://doi.org/10.1038/srep09671>
- Virk, S.A. and Eslick, G.D. (2015) Aluminum and Alzheimer's disease: a comprehensive meta-analysis. *Alzheimers Dement.* **11**, P149–P150, <https://doi.org/10.1016/j.jalz.2015.07.077>
- Nayak, P., Sharma, S.B. and Chowdhary, N.V.S. (2010) Augmentation of aluminum-induced oxidative stress in rat cerebrum by presence of pro-oxidant (graded doses of ethanol) exposure. *Neurochem. Res.* **35**, 1681–1690, <https://doi.org/10.1007/s11064-010-0230-3>
- Stephen, G. and Whitehouse, P.J. (1992) Alzheimer disease and associated disorders: integrative, international, interdisciplinary. *Alzheimer Dis. Assoc. Disord.* **6**, 269–270
- Pierce, A.L. and Kawas, C.H. (2017) Dementia in the oldest old: beyond Alzheimer disease. *PLoS Med.* **14**, e1002263, <https://doi.org/10.1371/journal.pmed.1002263>
- Peixoto, L. and Abel, T. (2013) The role of histone acetylation in memory formation and cognitive impairments. *Neuropsychopharmacology* **38**, 62–76, <https://doi.org/10.1038/npp.2012.86>
- Peleg, S., Sananbenesi, F., Zovoilis, A., Burkhardt, S., Baharijavan, S., Agisbalboa, R.C. et al. (2010) Altered histone acetylation is associated with age-dependent memory impairment in mice. *Science* **328**, 753, <https://doi.org/10.1126/science.1186088>
- Zatta, P., Kilyen, M. and Kiss, T. (2002) In vivo and in vitro effects of aluminum on the activity of mouse brain acetylcholinesterase. *Brain Res. Bull.* **59**, 41, [https://doi.org/10.1016/S0361-9230\(02\)00836-5](https://doi.org/10.1016/S0361-9230(02)00836-5)
- Ji, M., Dong, L., Jia, M., Liu, W., Zhang, M., Ju, L. et al. (2014) Epigenetic enhancement of brain-derived neurotrophic factor signaling pathway improves cognitive impairments induced by isoflurane exposure in aged rats. *Mol. Neurobiol.* **50**, 937, <https://doi.org/10.1007/s12035-014-8659-z>
- Zhong, T., Guo, Q., Zou, W., Zhu, X., Song, Z., Sun, B. et al. (2015) Neonatal isoflurane exposure induces neurocognitive impairment and abnormal hippocampal histone acetylation in mice. *PLoS ONE* **10**, e0125815, <https://doi.org/10.1371/journal.pone.0125815>
- Manoharan, S., Guillemin, G.J., Abiramasundari, R.S., Essa, M.M., Akbar, M. and Akbar, M.D. (2016) The role of reactive oxygen species in the pathogenesis of Alzheimer's disease, Parkinson's disease, and Huntington's Disease: a mini review. *Oxid. Med. Cell. Longev.* **2016**, 8590578, <https://doi.org/10.1155/2016/8590578>
- Benussi, L., Binetti, G. and Ghidoni, R. (2017) Loss of neuroprotective factors in neurodegenerative dementias: the end or the starting point? *Front. Neurosci.* **11**, 672, <https://doi.org/10.3389/fnins.2017.00672>
- Koppel, S.J. and Swerdlow, R.H. (2017) Neuroketotherapeutics: a modern review of a century-old therapy. *Neurochem. Int.* **117**, <https://doi.org/10.1016/j.neuint.2017.05.019>
- Yang, F.-Y. (2014) Method for treating and/or preventing neurodegenerative diseases by using low-intensity pulsed ultrasound (lipus). U.S. Pat. 20,160,067,526
- Hua, Z., Xin, L., Ph.D. H.W., Li, J.H. and Li, J.-M. (2009) Effect of low-intensity pulsed ultrasound on the expression of neurotrophin-3 and brain-derived neurotrophic factor in cultured Schwann cells. *Microsurgery* **29**, 479–485, <https://doi.org/10.1002/micr.20644>
- Budni, J., Bellettinisantos, T., Mina, F., Garcez, M.L. and Zugno, A.I. (2015) The involvement of BDNF, NGF and GDNF in aging and Alzheimer's disease. *Aging Dis.* **6**, 331–341, <https://doi.org/10.14336/AD.2015.0825>
